# Supplementary material for: HPV16-Immortalized Cells from Human Transformation Zone and Endocervix are More Dysplastic than Ectocervical Cells in Organotypic Culture
Source: PubMed Central journal article supplement (PMC6194146; doi:10.1038/s41598-018-33865-2), 2018-10-18
Supplement: 41598_2018_33865_MOESM1_ESM.pdf [file 41598_2018_33865_MOESM1_ESM.pdf]

**S1 Table. Raw data of dysplastic differentiation with stromal and J2 rafts**

| Epithelial cell | Raft    | Dysplastic grade |             |             |
|-----------------|---------|------------------|-------------|-------------|
|                 |         | Ecto             | TZ          | Endo        |
| <b>CX16-RV2</b> | Stromal | 1.20 ± 0.23      | 1.67 ± 0.27 | 3.00 ± 0.00 |
|                 | J2      | 1.23 ± 0.25      | 1.80 ± 0.23 | 3.00 ± 0.00 |
| <b>CX16-RV3</b> | Stromal | 1.30 ± 0.27      | 2.70 ± 0.27 | 2.63 ± 0.28 |
|                 | J2      | 1.23 ± 0.25      | 1.57 ± 0.29 | 2.57 ± 0.29 |
| <b>CX16-RV6</b> | Stromal | 1.03 ± 0.11      | 1.57 ± 0.29 | 1.70 ± 0.27 |
|                 | J2      | 1.13 ± 0.20      | 1.50 ± 0.29 | 1.40 ± 0.29 |
| <b>CX16-RV7</b> | Stromal | 1.07 ± 0.14      | 1.07 ± 0.14 | 2.73 ± 0.26 |
|                 | J2      | 1.13 ± 0.20      | 1.13 ± 0.20 | 2.87 ± 0.20 |
| <b>CX16-RV8</b> | Stromal | 1.77 ± 0.24      | 1.97 ± 0.10 | 2.00 ± 0.00 |
|                 | J2      | 1.53 ± 0.29      | 1.77 ± 0.24 | 2.57 ± 0.29 |
| <b>CX16-RV9</b> | Stromal | 1.10 ± 0.17      | 1.43 ± 0.29 | 2.23 ± 0.24 |
|                 | J2      | 1.13 ± 0.20      | 1.17 ± 0.22 | 1.73 ± 0.30 |
| <b>16-8</b>     | Stromal | 1.10 ± 0.18      | 2.87 ± 0.20 | 2.83 ± 0.22 |
|                 | J2      | 1.10 ± 0.18      | 2.30 ± 0.27 | 2.90 ± 0.18 |
| <b>16-9</b>     | Stromal | 1.17 ± 0.22      | 1.07 ± 0.15 | 2.97 ± 0.11 |
|                 | J2      | 1.60 ± 0.29      | 1.10 ± 0.18 | 3.00 ± 0.00 |
| <b>Mean</b>     | Stromal | 1.22 ± 0.15      | 1.79 ± 0.26 | 2.51 ± 0.20 |
|                 | J2      | 1.26 ± 0.16      | 1.54 ± 0.20 | 2.50 ± 0.24 |

\* Data shown is mean of epithelial dysplastic differentiation grading on 3 independent rafts ± standard error.

**S2 Table. Raw data of invasion grading with stromal and J2 rafts**

| Epithelial cell | Raft    | Invasion grade |             |             |
|-----------------|---------|----------------|-------------|-------------|
|                 |         | Ecto           | TZ          | Endo        |
| <b>CX16-RV2</b> | Stromal | 0.20 ± 0.23    | 1.30 ± 0.41 | 2.47 ± 0.33 |
|                 | J2      | 0.00 ± 0.00    | 0.10 ± 0.18 | 0.10 ± 0.18 |
| <b>CX16-RV3</b> | Stromal | 0.00 ± 0.00    | 1.10 ± 0.46 | 1.00 ± 0.45 |
|                 | J2      | 0.03 ± 0.11    | 0.13 ± 0.20 | 0.13 ± 0.20 |
| <b>CX16-RV6</b> | Stromal | 0.10 ± 0.18    | 2.80 ± 0.23 | 2.30 ± 0.27 |
|                 | J2      | 0.17 ± 0.22    | 2.33 ± 0.44 | 1.83 ± 0.37 |
| <b>CX16-RV7</b> | Stromal | 1.90 ± 0.38    | 1.77 ± 0.51 | 2.83 ± 0.22 |
|                 | J2      | 0.00 ± 0.00    | 0.00 ± 0.00 | 0.00 ± 0.00 |
| <b>CX16-RV8</b> | Stromal | 2.23 ± 0.41    | 2.83 ± 0.22 | 2.47 ± 0.47 |
|                 | J2      | 0.00 ± 0.00    | 0.20 ± 0.23 | 0.10 ± 0.17 |
| <b>CX16-RV9</b> | Stromal | 1.57 ± 0.36    | 2.57 ± 0.32 | 2.97 ± 0.10 |
|                 | J2      | 0.00 ± 0.00    | 0.00 ± 0.00 | 0.00 ± 0.00 |
| <b>16-8</b>     | Stromal | 0.23 ± 0.25    | 2.83 ± 0.22 | 2.70 ± 0.27 |
|                 | J2      | 0.63 ± 0.28    | 0.67 ± 0.32 | 2.07 ± 0.40 |
| <b>16-9</b>     | Stromal | 2.83 ± 0.22    | 2.27 ± 0.40 | 2.53 ± 0.30 |
|                 | J2      | 2.83 ± 0.22    | 2.13 ± 0.37 | 2.67 ± 0.32 |
| <b>Mean</b>     | Stromal | 1.13 ± 0.41    | 2.18 ± 0.32 | 2.41 ± 0.28 |
|                 | J2      | 0.46 ± 0.34    | 0.70 ± 0.36 | 0.86 ± 0.40 |

\* Data shown is mean of epithelial invasion grading on 3 independent rafts ± standard error.
